# Supplementary material for: Quantum Anharmonic Calculations of Vibrational Spectra for Water Adsorbed on Titania Anatase(101) Surface: Dissociative versus Molecular Adsorption
Source: PubMed Central journal article supplement (PMC9340806; doi:10.1021/acs.jpcc.2c02137), 2022-07-19
Supplement: jp2c02137_si_001.pdf [file jp2c02137_si_001.pdf]

Supplementary Information for: Quantum  
Anharmonic Calculations of Vibrational  
Spectra for Water Adsorbed on Titania  
Anatase (101) Surface: Dissociative versus  
Molecular Adsorption

Marco Cazzaniga,<sup>\*,†</sup> Marco Micciarelli,<sup>†</sup> Fabio Gabas,<sup>†</sup> Fabio Finocchi,<sup>‡</sup> and  
Michele Ceotto<sup>\*,†</sup>

<sup>†</sup>*Dipartimento di Chimica, Università degli Studi di Milano, via Golgi 19, 20133 Milano,  
Italy.*

<sup>‡</sup>*Sorbonne Université, CNRS, Institut des NanoSciences de Paris (INSP), 4 Place Jussieu,  
Paris F- 75005, France.*

E-mail: marco.cazzaniga@unimi.it; michele.ceotto@unimi.it

**Table S1: Effects of the U parameter and the dispersion terms on the relevant geometrical coordinates and binding energies for molecular H<sub>2</sub>O adsorption on the TiO<sub>2</sub> anatase (101) surface. The value chosen for the Hubbard U is 3.3 eV.**

|             | Layers | DFT<br>$V_{xc}$ |               | $r(\text{Ti}_{5c}-\text{O}_w)$<br>[Å] | $r(\text{O}_w-\text{H})$<br>[Å] | $d(\text{O}_{2c}-\text{H})$<br>[Å] | $\alpha(\text{H}-\text{O}_w-\text{H})$<br>[°] | BE <sup>a</sup><br>[eV] |
|-------------|--------|-----------------|---------------|---------------------------------------|---------------------------------|------------------------------------|-----------------------------------------------|-------------------------|
| Q-E present | 4L     | PBE             | $\theta=0.25$ | 2.289                                 | 0.984                           | 2.284                              | 103.89                                        | 0.76                    |
| Q-E present | 4L     | PBE+U           | $\theta=0.25$ | 2.289                                 | 0.986                           | 2.240/2.237                        | 103.54                                        | 0.84                    |
| Q-E present | 4L     | PBE-D3          | $\theta=0.25$ | 2.284                                 | 0.986                           | 2.184                              | 103.45                                        | 1.00                    |

<sup>a</sup>Experimental value 0.5-0.7 eV.<sup>1</sup>

**Table S2: Effects of the U parameter and the dispersion terms on the relevant geometrical coordinates and binding energies for dissociative H<sub>2</sub>O adsorption on the TiO<sub>2</sub> anatase (101) surface. The value chosen for the Hubbard U is 3.3 eV.**

|                                          | Layers | DFT<br>$V_{xc}$ | $\theta$ | $r(\text{Ti}_{5c}-\text{O}_w)$<br>[Å] | $r(\text{O}_w-\text{H})$<br>[Å] | $d(\text{O}_{2c}-\text{H})$<br>[Å] | $d(\text{O}_w-\text{H}_{diss})$<br>[Å] | $\alpha(\text{O}_w-\text{H}_{diss}-\text{O}_{2c})$<br>[°] | BE<br>[eV] |
|------------------------------------------|--------|-----------------|----------|---------------------------------------|---------------------------------|------------------------------------|----------------------------------------|-----------------------------------------------------------|------------|
| <b>Intrapair Dissociative Adsorption</b> |        |                 |          |                                       |                                 |                                    |                                        |                                                           |            |
| Q-E present                              | 4L     | PBE             | 0.25     | 1.824                                 | 0.976                           | 0.973                              | 2.680                                  | 79.578                                                    | 0.41       |
| Q-E present                              | 4L     | PBE+U           | 0.25     | 1.848                                 | 0.977                           | 0.972                              | 2.685                                  | 80.048                                                    | 0.55       |
| Q-E present                              | 4L     | PBE-D3          | 0.25     | 1.822                                 | 0.977                           | 0.972                              | 2.735                                  | 78.015                                                    | 0.57       |
| <b>Interpair Dissociative Adsorption</b> |        |                 |          |                                       |                                 |                                    |                                        |                                                           |            |
| Q-E present                              | 4L     | PBE             | 0.25     | 1.854                                 | 0.975                           | 0.982                              | 2.487                                  | 138.282                                                   | 0.29       |
| Q-E present                              | 4L     | PBE+U           | 0.25     | 1.885                                 | 0.976                           | 0.983                              | 2.410                                  | 139.841                                                   | 0.43       |
| Q-E present                              | 4L     | PBE-D3          | 0.25     | 1.863                                 | 0.976                           | 0.984                              | 2.331                                  | 142.441                                                   | 0.51       |

**Table S3:** Comparison of harmonic frequencies for H<sub>2</sub>O and D<sub>2</sub>O adsorbed on the TiO<sub>2</sub> anatase (101) surface for different computational set-up. Finite Difference calculations have been performed with an atomic displacements of 0.01 Å and the frequencies are in cm<sup>-1</sup>.

|             | Layers | DFT      | $\theta$ | Method | H <sub>2</sub> O    |                                          | D <sub>2</sub> O |                      |                       |      |  |
|-------------|--------|----------|----------|--------|---------------------|------------------------------------------|------------------|----------------------|-----------------------|------|--|
|             |        | $V_{xc}$ |          |        |                     | <b>Molecular Adsorption</b>              |                  |                      |                       |      |  |
| Q-E present | 4L     | PBE      | 0.25     | DFPT   | 1586                | 3580                                     | 3647             | 1163                 | 2581                  | 2673 |  |
| Q-E present | 4L     | PBE      | 0.25     | FD     | 1578                | 3580                                     | 3670             | 1158                 | 2583                  | 2685 |  |
| Q-E present | 4L     | PBE+U    | 0.25     | FD     | 1582                | 3549                                     | 3635             | 1161                 | 2562                  | 2659 |  |
| Q-E present | 4L     | PBE-D3   | 0.25     | FD     | 1587                | 3560                                     | 3621             | 1164                 | 2565                  | 2653 |  |
|             |        |          |          |        |                     | <b>Intrapair Dissociative Adsorption</b> |                  |                      |                       |      |  |
|             |        |          |          |        | (O <sub>w</sub> -H) | (O <sub>2c</sub> -H)                     |                  | (O <sub>w</sub> - D) | (O <sub>2c</sub> - D) |      |  |
| Q-E present | 4L     | PBE      | 0.25     | DFPT   | 3760                | 3797                                     |                  | 2738                 | 2765                  |      |  |
| Q-E present | 4L     | PBE      | 0.25     | FD     | 3745                | 3760                                     |                  | 2731                 | 2738                  |      |  |
| Q-E present | 4L     | PBE+U    | 0.25     | FD     | 3752                | 3753                                     |                  | 2731                 | 2737                  |      |  |
| Q-E present | 4L     | PBE-D3   | 0.25     | FD     | 3748                | 3753                                     |                  | 2731                 | 2734                  |      |  |
|             |        |          |          |        |                     | <b>Interpair Dissociative Adsorption</b> |                  |                      |                       |      |  |
|             |        |          |          |        | (O <sub>w</sub> -H) | (O <sub>2c</sub> -H)                     |                  | (O <sub>w</sub> - D) | (O <sub>2c</sub> - D) |      |  |
| Q-E present | 4L     | PBE      | 0.25     | DFPT   | 3775                | 3644                                     |                  | 2748                 | 2654                  |      |  |
| Q-E present | 4L     | PBE      | 0.25     | FD     | 3736                | 3614                                     |                  | 2723                 | 2634                  |      |  |
| Q-E present | 4L     | PBE+U    | 0.25     | FD     | 3718                | 3581                                     |                  | 2710                 | 2610                  |      |  |
| Q-E present | 4L     | PBE-D3   | 0.25     | FD     | 3717                | 3554                                     |                  | 2709                 | 2591                  |      |  |

**Table S4:** Convergence test of the harmonic frequencies *vs* the k-point sampling of the Brillouin zone. All the frequencies are in cm<sup>-1</sup>.

|              | Molecular H <sub>2</sub> O |      |      | Intrapair H <sub>2</sub> O |      | Interpair H <sub>2</sub> O |      |
|--------------|----------------------------|------|------|----------------------------|------|----------------------------|------|
| Γ-point only | 1586                       | 3580 | 3647 | 3760                       | 3797 | 3775                       | 3644 |
| 2×2×1        | 1589                       | 3582 | 3647 | 3746                       | 3793 | 3784                       | 3663 |
| 4×4×1        | 1589                       | 3581 | 3647 | 3746                       | 3793 | 3784                       | 3663 |

**Table S5:** Convergence test of the harmonic frequencies *vs* the slab thickness. All the frequencies are in cm<sup>-1</sup>.

|          | Molecular H <sub>2</sub> O |      |      | Intrapair H <sub>2</sub> O |      | Interpair H <sub>2</sub> O |      |
|----------|----------------------------|------|------|----------------------------|------|----------------------------|------|
| 4 Layers | 1586                       | 3580 | 3647 | 3760                       | 3797 | 3775                       | 3644 |
| 6 Layers | 1586                       | 3579 | 3645 | 3761                       | 3795 | 3772                       | 3653 |
| 8 Layers | 1588                       | 3577 | 3643 | 3761                       | 3795 | 3769                       | 3650 |

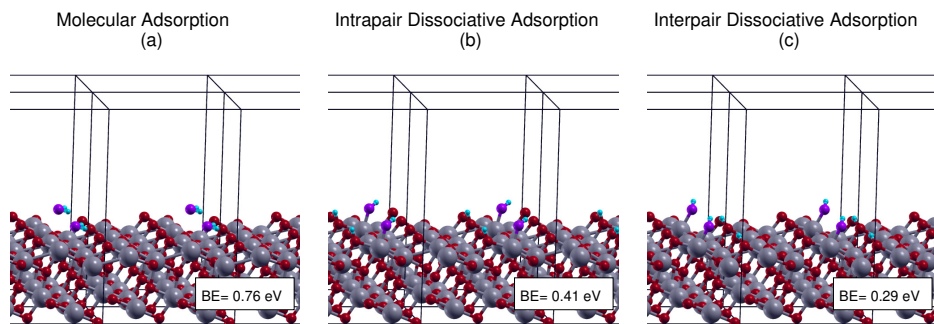

Figure S1: Supercell optimized geometries of molecular and dissociative H<sub>2</sub>O adsorption on the TiO<sub>2</sub> anatase (101) surface. Titanium atoms are in gray, surface oxygen in red, molecular oxygen in violet and hydrogen in cyan.

**Table S6: Comparison of vibrational frequencies of H<sub>2</sub>O in gas phase. All the frequencies are in cm<sup>-1</sup>.**

|                           |                 | Gas Phase Molecular H <sub>2</sub> O |          |                      |          |                       |          |
|---------------------------|-----------------|--------------------------------------|----------|----------------------|----------|-----------------------|----------|
|                           |                 | Bending                              |          | Symmetric Stretching |          | Asymmetric Stretching |          |
|                           |                 | Frequency                            | $\Delta$ | Frequency            | $\Delta$ | Frequency             | $\Delta$ |
| Experiment <sup>2-4</sup> |                 | 1595                                 |          | 3657                 |          | 3756                  |          |
| Q-E PBE                   | Harmonic        | 1580                                 |          | 3731                 |          | 3843                  |          |
|                           | Quasi-classical | 1545                                 | -35      | 3602                 | -129     | 3683                  | -160     |
|                           | DC SCIVR        | 1546                                 | -34      | 3602                 | -129     | 3682                  | -161     |
| NWChem PBE                | Harmonic        | 1605                                 |          | 3707                 |          | 3809                  |          |
|                           | Quasi-classical | 1577                                 | -28      | 3587                 | -120     | 3657                  | -152     |
|                           | DC SCIVR        | 1578                                 | -27      | 3588                 | -119     | 3658                  | -151     |
| NWChem PBE0               | Harmonic        | 1641                                 |          | 3874                 |          | 3975                  |          |
|                           | Quasi-classical | 1612                                 | -29      | 3758                 | -116     | 3831                  | -144     |
|                           | DC SCIVR        | 1612                                 | -29      | 3758                 | -116     | 3832                  | -143     |
| NWChem B3LYP              | Harmonic        | 1638                                 |          | 3807                 |          | 3905                  |          |
|                           | Quasi-classical | 1609                                 | -29      | 3691                 | -116     | 3756                  | -149     |
|                           | DC SCIVR        | 1608                                 | -30      | 3690                 | -117     | 3756                  | -149     |

**Table S7: Comparison of vibrational frequencies of D<sub>2</sub>O in gas phase. All the frequencies are in cm<sup>-1</sup>.**

|                             |                 | Gas Phase Molecular D <sub>2</sub> O |          |                      |          |                       |          |
|-----------------------------|-----------------|--------------------------------------|----------|----------------------|----------|-----------------------|----------|
|                             |                 | Bending                              |          | Symmetric Stretching |          | Asymmetric Stretching |          |
|                             |                 | Frequency                            | $\Delta$ | Frequency            | $\Delta$ | Frequency             | $\Delta$ |
| Experiment <sup>2,3,5</sup> |                 | 1178                                 |          | 2671                 |          | 2788                  |          |
| Q-E PBE                     | Harmonic        | 1156                                 |          | 2689                 |          | 2815                  |          |
|                             | Quasi-classical | 1138                                 | -18      | 2617                 | -72      | 2733                  | -82      |
|                             | DC SCIVR        | 1138                                 | -18      | 2618                 | -71      | 2732                  | -83      |
| NWChem PBE                  | Harmonic        | 1174                                 |          | 2673                 |          | 2789                  |          |
|                             | Quasi-classical | 1159                                 | -15      | 2607                 | -66      | 2713                  | -76      |
|                             | DC SCIVR        | 1160                                 | -14      | 2608                 | -65      | 2712                  | -77      |
| NWChem PBE0                 | Harmonic        | 1200                                 |          | 2793                 |          | 2912                  |          |
|                             | Quasi-classical | 1185                                 | -15      | 2730                 | -63      | 2839                  | -73      |
|                             | DC SCIVR        | 1186                                 | -14      | 2730                 | -63      | 2838                  | -74      |
| NWChem B3LYP                | Harmonic        | 1198                                 |          | 2745                 |          | 2860                  |          |
|                             | Quasi-classical | 1183                                 | -15      | 2680                 | -65      | 2786                  | -74      |
|                             | DC SCIVR        | 1182                                 | -16      | 2680                 | -65      | 2786                  | -74      |

(a) H<sub>2</sub>O Molecular Adsorption

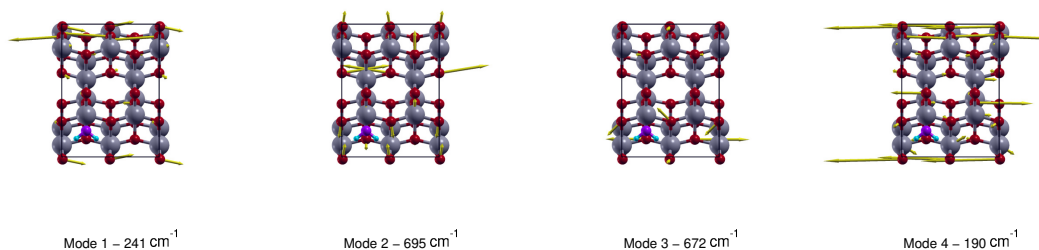

Figure S2: Plot of normalized eigen-displacements for the first 4 modes entering in the subspace for molecular adsorbed H<sub>2</sub>O.

(b) D<sub>2</sub>O Molecular Adsorption

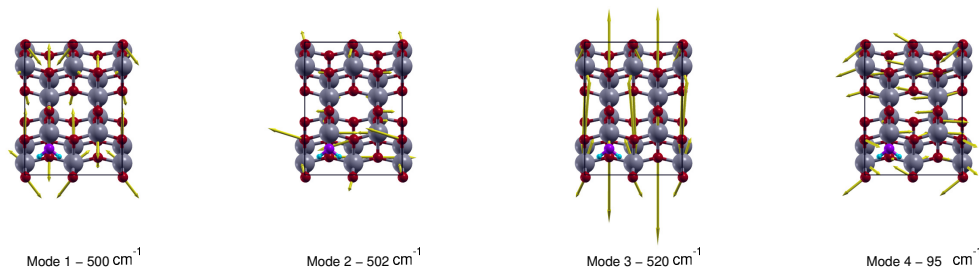

Figure S3: Plot of normalized eigen-displacements for the first 4 modes entering in the subspace for molecular adsorbed D<sub>2</sub>O.

(c) H<sub>2</sub>O Intrapair Dissociative Adsorption – O<sub>w</sub>-H Stretching

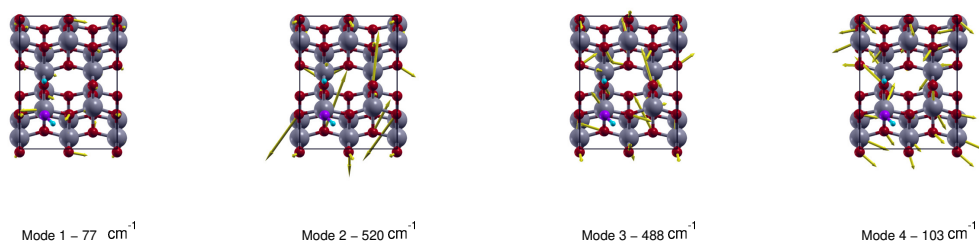

(d) H<sub>2</sub>O Intrapair Dissociative Adsorption – O<sub>2c</sub>-H Stretching

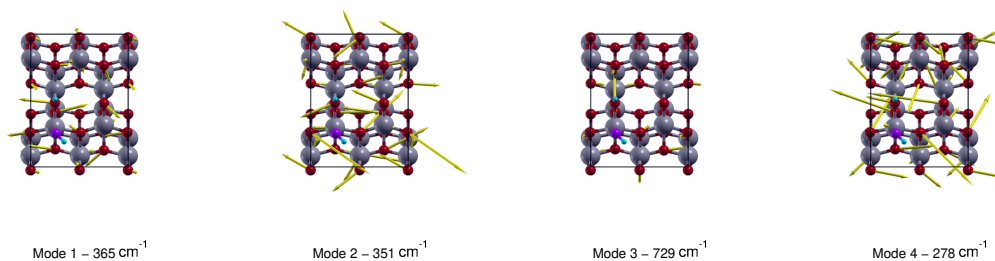

Figure S4: Plot of normalized eigen-displacements for the first 4 modes entering in the subspace for intrapair dissociative adsorbed H<sub>2</sub>O.

(e) D<sub>2</sub>O Intrapair Dissociative Adsorption – O<sub>w</sub>-H Stretching

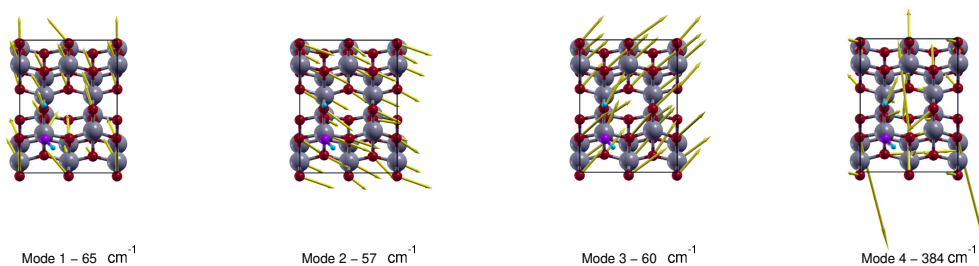

(f) D<sub>2</sub>O Intrapair Dissociative Adsorption – O<sub>2c</sub>-H Stretching

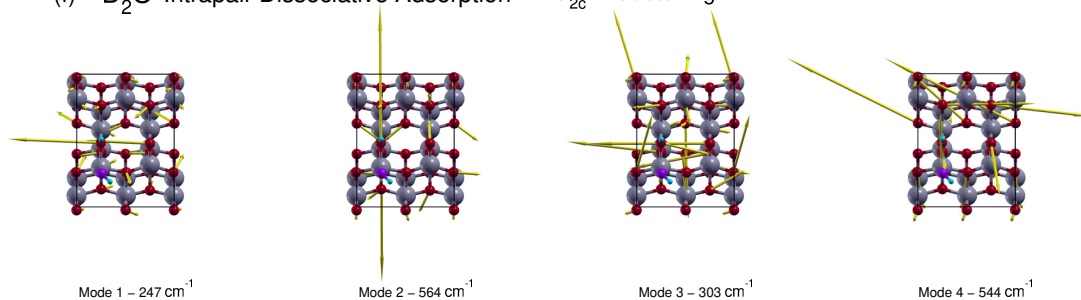

Figure S5: Plot of normalized eigen-displacements for the first 4 modes entering in the subspace for intrapair dissociative adsorbed D<sub>2</sub>O.

(g) H<sub>2</sub>O Interpair Dissociative Adsorption – O<sub>2c</sub>-H Stretching

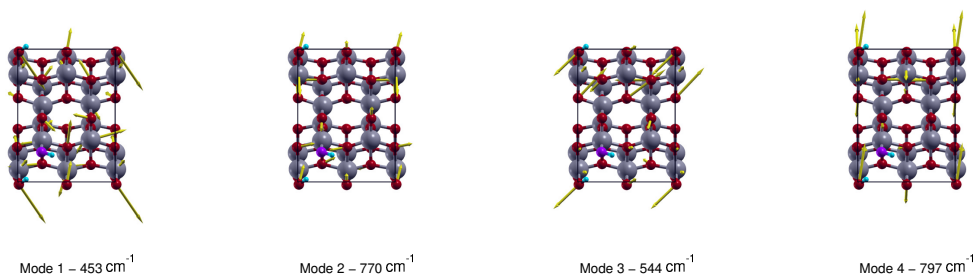

(h) H<sub>2</sub>O Interpair Dissociative Adsorption – O<sub>w</sub>-H Stretching

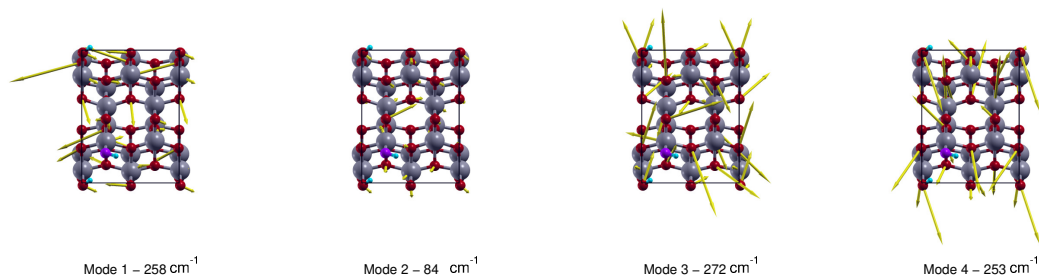

Figure S6: Plot of normalized eigen-displacements for the first 4 modes entering in the subspace for interpair dissociative adsorbed H<sub>2</sub>O.

(i) D<sub>2</sub>O Interpair Dissociative Adsorption – O<sub>2c</sub>-H Stretching

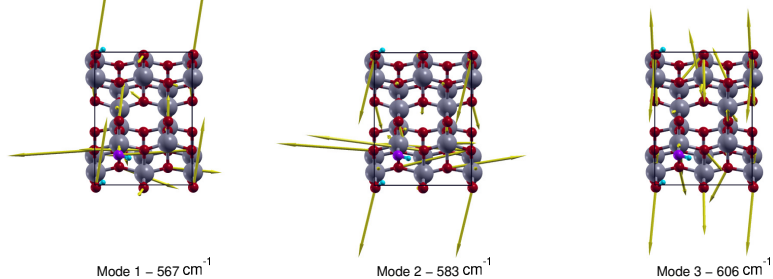

(j) D<sub>2</sub>O Interpair Dissociative Adsorption – O<sub>w</sub>-H Stretching

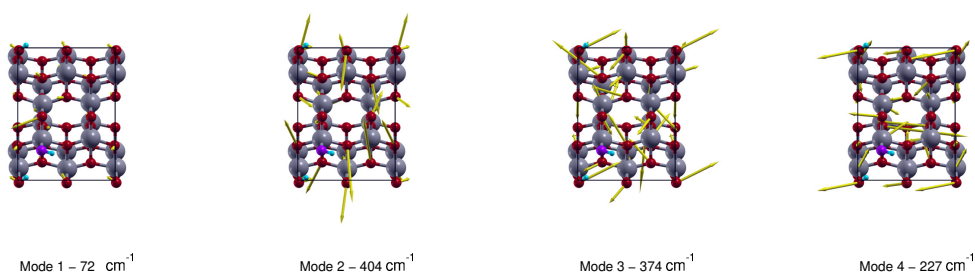

Figure S7: Plot of normalized eigen-displacements for the first 4 modes entering in the subspace for the interpair dissociative adsorbed D<sub>2</sub>O.

## References

- (1) Egashira, M.; Kawasumi, S.; Kagawa, S.; Seiyama, T. Temperature Programmed Desorption Study of Water Adsorbed on Metal Oxides. I. Anatase and Rutile. *B. Chem. Soc. Jpn.* **1978**, *51*, 3144–3149.
- (2) NIST Computational Chemistry Comparison and Benchmark Database, NIST Standard Reference Database Number 101, Release 19, April 2018, Editor: Russell D. Johnson III, <http://ccbdb.nist.gov/>.
- (3) Shimanouchi, T. *Tables of Molecular Vibrational Frequencies Consolidated, Volume I*; National Bureau of Standard, 1972.
- (4) Huber, G., K. P.; Herzberg *Molecular Spectra and Molecular Structure IV. Constants of Diatomic Molecules*; Springer New York, NY, 1979.
- (5) Varetti, E. A far infrared and theoretical ab initio vibrational study of fluorosulfonic acid as monomer and cyclic dimer. *J. Mol. Struct.-THEOCHEM* **1998**, *429*, 121–130.
